# Supplementary material
Source: PubMed Central journal article supplement (PMC6372100)
Supplement: NIHMS1004883-supplement-Supplemental_materail.pdf [file NIHMS1004883-supplement-Supplemental_materail.pdf]

## Regulation of the cardioprotective adiponectin and its receptor AdipoR1 by salt

Nicholas Arnold<sup>1,3</sup>, Abuzar Mahamood<sup>1,3</sup>, Maya Ramdas<sup>4</sup>, Paul P. Ehlinger<sup>1,3</sup> and Lakshmi

Pulakat<sup>1,2,3</sup>

<sup>1</sup>Department of Medicine and <sup>2</sup>Department of Nutrition and Exercise Physiology, University of Missouri, Columbia, MO; <sup>3</sup>Harry S Truman Memorial Veterans Affairs Hospital, Columbia, MO; <sup>4</sup>Department of Biological Sciences, Mississippi State University, Starkville, MS

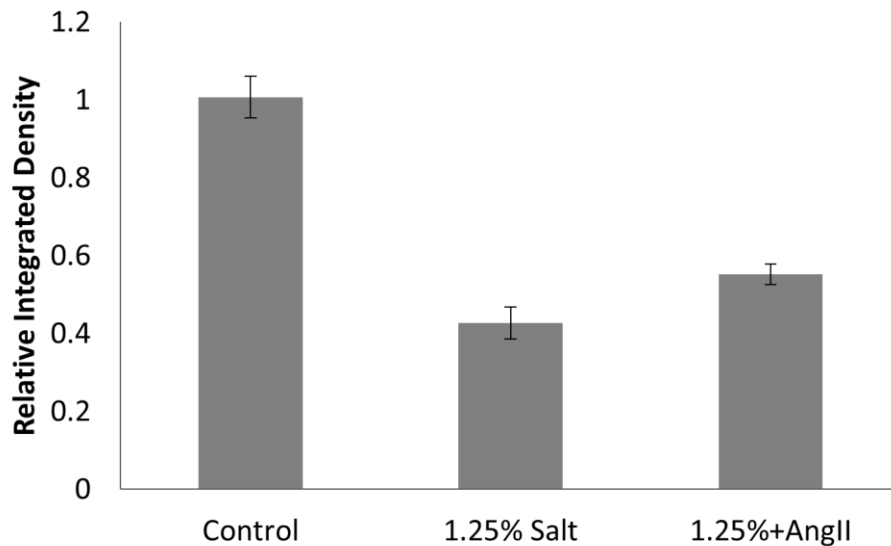

**Supplemental Fig S1 - AngII did not rescue AdipoR1 expression in H9c2 cells exposed to high salt conditions.** Graph shows immunofluorescence intensity quantification for Rat H9c2 probed for AdipoR1. Suppression of AdipoR1 was observed in response to 1.25% salt treatment. Ang II treatment did not restore AdipoR1 expression to similar levels as seen in untreated cells (n=3 for each group, average of 35 cells measured per group). Values are means ± SEM.
